# Supplementary material for: Time-Resolved Corrosion Behavior of Transition-Metal-Based High-Entropy Alloy in Saline and Phosphate Buffer Solutions
Source: MDPI journal article supplement (doi:10.3390/met13050951), 2023-05-14
Supplement: s1 [file s1]

# Supplementary Materials

## Time-Resolved Corrosion Behavior of Transition-Metal-Based High-Entropy Alloy in Saline and Phosphate Buffer Solutions

Baran Sarac

Erich Schmid Institute of Materials Science, Austrian Academy of Sciences, 8700 Leoben, Austria Email: baran.sarac@oeaw.ac.at

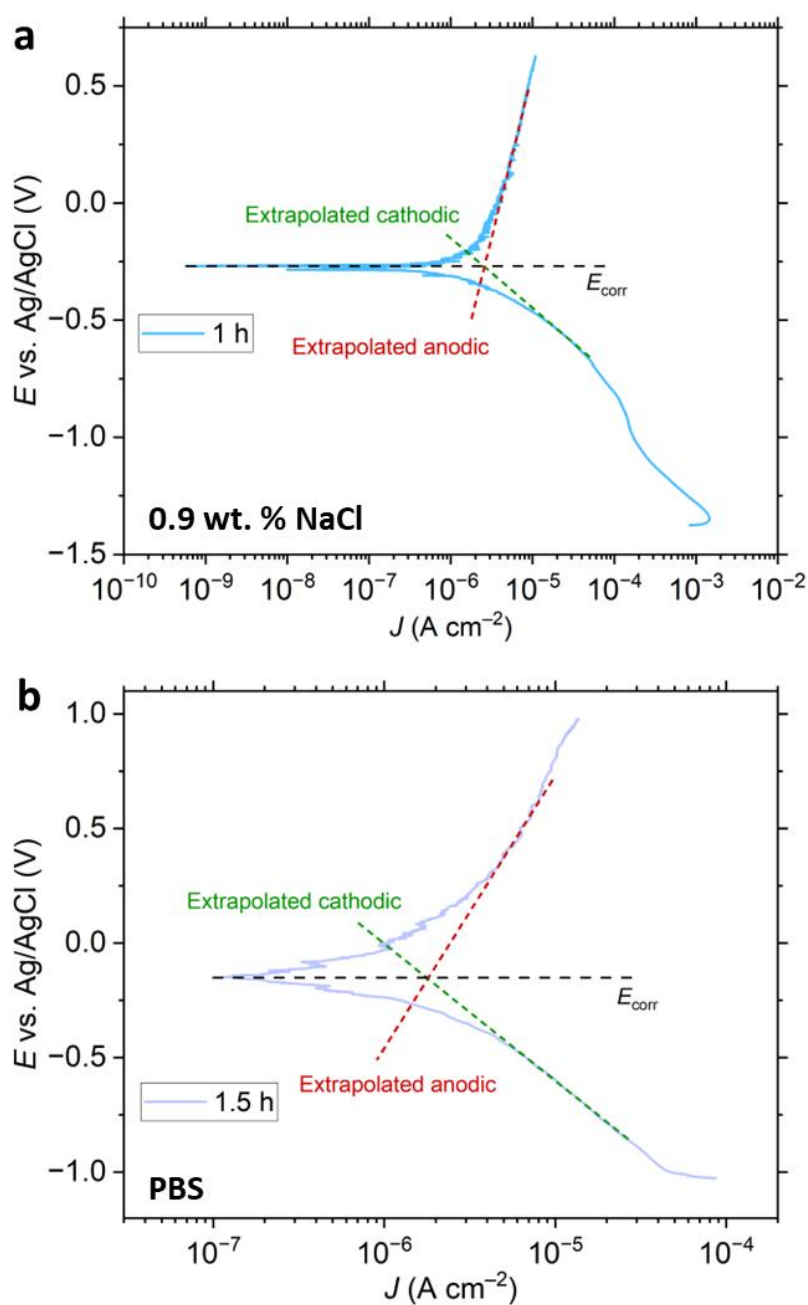

**Figure S1.** Extrapolated cathodic and anodic branches and their intersection with the steady-state OCP potential at 37 °C for (a) 0.9 wt% NaCl at 1 h and (b) PBS solutions at 1.5 h.

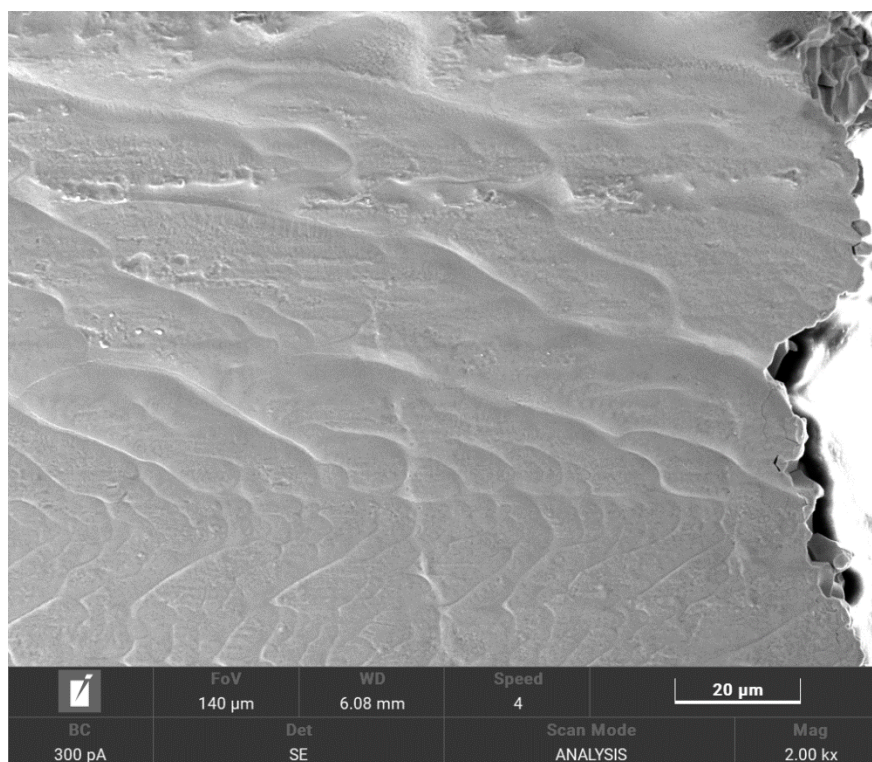

**Figure S2.** Sample surface after polarization in PBS solution and subsequent rinsing with water.
